# Supplementary material for: Akutversorgung psychisch kranker Kinder und Jugendlicher: Eine Pilotstudie an 257 PatientInnen
Source: Springer Nature journal article supplement (doi:10.1007/s40211-021-00389-7), 2021-03-15
Supplement: MOESM1 [file 18969230]

UNIVERSITÄTSKLINIK FÜR KINDER- UND JUGENDPSYCHIATRIE  
PMU/SALK/CDK  
NF-TRIAGIERUNG

Name des Patienten:

Geburtsdatum:

Grund der Vorstellung:

Erstkontakt mit Pflegepersonal: Datum/Uhrzeit:  
 Gespräch mit Patient/in: ja nein Uhrzeit:  
 Gespräch mit anderen Personen: ja nein  
 mit wem:  
 Bereits an der Abteilung bekannt: ja nein wann:  
 Arzt/Ärztin verständigt: o Tagdienst Uhrzeit: Name:  
 o Journaldienst Uhrzeit: Name:  
 Arzt eingetroffen: Uhrzeit:

Konsil:  Ja  nein von wo:

Ja Nein falls „ja“

- Paragraph 8 oder 9?  Ja  Nein =N
- Reagiert der Patient nicht altersadäquat auf Ansprache?  Ja  Nein =N
- Suizidgedanken vorhanden? (wenn „Ja“ suizid Skala vorlegen)  Ja  Nein =N
- Fremdgefährliches Verhalten vorliegend?  Ja  Nein =N
- Orientierung zu Person, Ort, Situation nicht altersadäquat vorhanden?  Ja  Nein =N
- Starke Unruhe/Erregung (in Motorik oder/und innerem Erleben)  Ja  Nein =N
- Fluchtgefahr  Ja  Nein =N

Ab einem N = Notfall

Zur Vorstellung führende Symptome bestehen in ähnlicher Weise/Intensität seit:

RR:

Puls:

Schmerzen:

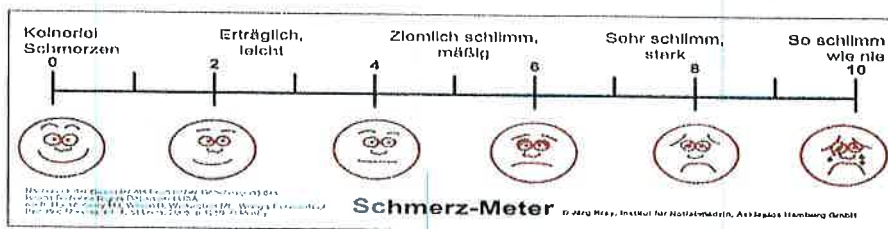

### Einstufung 0-5 bei Suizidalität

| 0 | keine                                    | gar keine Gedanken an Suizid    | gar keine Gedanken an Suizid                                                                                                                                               |
|---|------------------------------------------|---------------------------------|----------------------------------------------------------------------------------------------------------------------------------------------------------------------------|
| 1 | kaum                                     | rein gedanklich                 | Gedanken an Suizid Schwirren rum, sind aber nicht konkret, nur ab und zu, im Sinne von Blitzgedanken, ohne emotionale Beteiligung                                          |
| 2 | mässig                                   | mit emotionaler Beteiligung     | Gedanken sind schon etwas konkreter und öfter, verbunden mit einem gefühltem Todeswunsch                                                                                   |
| 3 | drängend                                 | spürbarer Kampf                 | Todeswunsch und Lebenswille halten sich gerade noch die Waage, Lebensgründe sind aber noch deutlich spürbar und haben noch einen erkennbaren Wert                          |
| 4 | sehr drängend                            | Unterstützung ist absolut nötig | Todeswunsch überwiegt, die Selbstkontrolle existiert aber noch                                                                                                             |
| 5 | Denken ist auf Suizidideen eingeschränkt | Abklärung ist zwingend nötig    | d.h. ohne Unterstützung von aussen besteht keine sichere Kontrolle mehr, eine andere Person ist nötig, um wieder den notwendigen Abstand zu den Suizidgedanken zu bekommen |

verweigert

UNIVERSITÄTSKLINIK FÜR KINDER- UND JUGENDPSYCHIATRIE  
 PMU/SALK/CDK  
 NF-TRIAGIERUNG

| Dat. |  | HZ |
|------|--|----|
|      |  |    |
|      |  |    |
|      |  |    |
|      |  |    |
|      |  |    |
|      |  |    |
|      |  |    |
|      |  |    |
|      |  |    |
|      |  |    |
|      |  |    |
|      |  |    |
|      |  |    |
|      |  |    |
|      |  |    |
|      |  |    |
|      |  |    |
|      |  |    |
|      |  |    |
|      |  |    |
|      |  |    |

|                                                                                                                                                                                                  |                       |                                                                                                                |
|--------------------------------------------------------------------------------------------------------------------------------------------------------------------------------------------------|-----------------------|----------------------------------------------------------------------------------------------------------------|
| <div style="border: 1px solid black; border-radius: 50%; width: 100%; height: 100%; text-align: center; padding: 10px;">                 Gewalt als Mittel zur Zielerreichung             </div> | <input type="radio"/> | Starrer „Kalter „ Blick<br>Drohende offensive Haltung<br>Oft gebundene hohe Anspannung<br>Sachbeschädigung     |
| <div style="border: 1px solid black; border-radius: 50%; width: 100%; height: 100%; text-align: center; padding: 10px;">                 Frustrationsreaktion             </div>                 | <input type="radio"/> | Motorische Unruhe, starke Reizbarkeit<br>„Herumschimpfen“ ev. Kontrollverlust<br>Rascher Aufbau hoher Spannung |
| <div style="border: 1px solid black; border-radius: 50%; width: 100%; height: 100%; text-align: center; padding: 10px;">                 Manipulation             </div>                         | <input type="radio"/> | Erhöhter Antrieb, gezielte verbale Drohung<br>Gezielte Beleidigung, mittelhohe Anspannung                      |
| <div style="border: 1px solid black; border-radius: 50%; width: 100%; height: 100%; text-align: center; padding: 10px;">                 Förderndes Verhalten             </div>                 | <input type="radio"/> | Ungeduld, Reizbarkeit<br>Geringe Flexibilität, hinhalten, fordernd                                             |
| <div style="border: 1px solid black; border-radius: 50%; width: 100%; height: 100%; text-align: center; padding: 10px;">                 (Empty circle)             </div>                       | <input type="radio"/> | keine Fremdaggressionen                                                                                        |
